# Supplementary material
Source: PubMed Central journal article supplement (PMC4377315)
Supplement: NIHMS619140-supplement-2.pdf [file NIHMS619140-supplement-2.pdf]

Table S1. Cancer-associated PTEN mutations used in this study

| Mutation ID (COSM) | Substitution | Mutation | Sample name     | Primary Tissue                     | Histology         | Zygosity     | Somatic Status    | Sample Source | Pubmed ID |
|--------------------|--------------|----------|-----------------|------------------------------------|-------------------|--------------|-------------------|---------------|-----------|
| COSM428078         | S10R         | 28A>C    | TCGA-AR-A1AJ-01 | Breast                             | Carcinoma         | Heterozygous | Unknown           | Tumour Sample | -         |
| COSM5049           | S10N         | 29G>A    | S65930          | Haematopoietic and lymphoid tissue | Lymphoid neoplasm | Unknown      | Confirmed Somatic | Tumour Sample | 9596690   |
| COSM5049           | S10N         | 29G>A    | 16600           | Lung                               | Carcinoma         | Heterozygous | Confirmed Somatic | Tumour Sample | 18948947  |
| COSM1349462        | S10I         | 29G>T    | TCGA-AZ-6601-01 | Large intestine                    | Carcinoma         | Heterozygous | Unknown           | -             | -         |
| COSM1349467        | G20R         | 58G>A    | TCGA-DM-A0XD-01 | Large intestine                    | Carcinoma         | Heterozygous | Unknown           | -             | -         |
| COSM5094           | G20E         | 59G>A    | S63064          | Endometrium                        | Carcinoma         | Unknown      | Confirmed Somatic | Tumour Sample | 9829719   |
| COSM3397281        | L42V         | 124C>G   | TCGA-28-5216-01 | Central nervous system             | Glioma            | Unknown      | Confirmed Somatic | -             | -         |
| COSM5112           | L42P         | 125T>C   | S66696          | Central nervous system             | Glioma            | Unknown      | Confirmed Somatic | Tumour Sample | 10188904  |
| COSM5269           | L42R         | 125T>G   | S67017          | Central nervous system             | Glioma            | Unknown      | Unknown           | Tumour Sample | 11678426  |
| COSM5269           | L42R         | 125T>G   | S67046          | Central nervous system             | Glioma            | Unknown      | Unknown           | Tumour Sample | 11678426  |
| COSM5269           | L42R         | 125T>G   | S67048          | Central nervous system             | Glioma            | Unknown      | Unknown           | Tumour Sample | 11678426  |
| COSM5269           | L42R         | 125T>G   | S67049          | Central nervous system             | Glioma            | Unknown      | Unknown           | Tumour Sample | 11678426  |
| COSM5269           | L42R         | 125T>G   | T98G            | Central nervous system             | Glioma            | Unknown      | Unknown           | Cultured      | 10560660  |
| COSM5269           | L42R         | 125T>G   | T98G            | Central nervous system             | Glioma            | Unknown      | Unknown           | Cultured      | 9090379   |
| COSM1349496        | F90L         | 268T>C   | TCGA-CA-5796-01 | Large intestine                    | Carcinoma         | Heterozygous | Unknown           | -             | -         |
| COSM5141           | F90S         | 269T>C   | TCGA-06-0743-01 | Central nervous system             | Glioma            | Unknown      | Confirmed Somatic | Tumour Sample | -         |
| COSM5141           | F90S         | 269T>C   | S75520          | Endometrium                        | Carcinoma         | Unknown      | Confirmed Somatic | Tumour Sample | 9307275   |
| COSM1349497        | F90C         | 269T>G   | TCGA-F4-6809-01 | Large intestine                    | Carcinoma         | Heterozygous | Unknown           | -             | -         |
| COSM5201           | F90L         | 270T>A   | S70685          | Upper aerodigestive tract          | Carcinoma         | Unknown      | Confirmed Somatic | Tumour Sample | 11801303  |

Sanger Institute Catalogue Of Somatic Mutations In Cancer web site, <http://www.sanger.ac.uk/cosmic>
