# Supplementary material
Source: PubMed Central journal article supplement (PMC4377315)
Supplement: NIHMS619140-supplement-3.pdf [file NIHMS619140-supplement-3.pdf]

Table S2. Primers used in this study

|                           |                                      |
|---------------------------|--------------------------------------|
| HuPTEN5BamHI2             | ctgggatccaataaaaATGACAGCCATC         |
| HuPTEN3XhoI2              | ctcctcgagccGACTTTTGTAATTTG           |
| PTEN-S10N-f               | ATGACAGCCATCATCAAAGAGATCGTTAACAGAAAC |
| PTEN-G20E-f               | CAAGAGGATGAATTCGACTTAGAC             |
| PTEN-G20E-r               | GTCTAAGTCGAATTCATCCTCTTG             |
| PTEN-F90S-f               | GTTGCACAATATCCTTCTGAAGACC            |
| PTEN-F90S-r               | GGTCTTCAGAAGGATATTGTGCAAC            |
| PTEN-TOPO-f               | CACCATGA CAGCCATCAT CAAAG            |
| GFP-TOPO-r                | TTACTTGTACAGCTCGTCCATG               |
| PTEN-BamHI-Kozak-f        | GTTGGATCCGCCACCATGACAGCCATC          |
| GFP-NotI-r                | CTGCGGCCGCTTACTTGTACAGCTC            |
| PTEN-PkbR1-BamHI          | CTTGGATCCACAGCCATCATCAAAGAG          |
| PkbR1-TOPO-f              | CACCATGGGAAAAGGACAAAG                |
| PkbR BamHI Start          | GAGGATCCaaataaaaATGGGAAAAGGACAAAG    |
| PkbR XhoI BglII 162-145 2 | CCGCTCGAGaaAGATCTTTGTTGTGCACTATTATC  |
