# Supplementary material
Source: PubMed Central journal article supplement (PMC4377315)
Supplement: NIHMS619140-supplement-4.pdf [file NIHMS619140-supplement-4.pdf]

Table S3. Plasmids used in this study

| Plasmids            | Description                                                                                                                         | References                  |
|---------------------|-------------------------------------------------------------------------------------------------------------------------------------|-----------------------------|
| pKF3                |                                                                                                                                     | Provided by Swaney K.       |
| pKF3-hPTEN          | hPTEN was amplified using primers HuPTEN5BamHI2 and HuPTEN3XhoI2, and inserted into <i>BglIII/XhoI</i> pKF3                         | Nguyen <i>et al.</i> (2013) |
| pKF3-A4             | A4 was amplified using primers HuPTEN5BamHI2 and HuPTEN3XhoI2, and inserted into <i>BglIII/XhoI</i> pKF3                            | Nguyen <i>et al.</i> (2013) |
| pKF3-S10N           | hPTEN was mutated using primers HuPTEN5BamHI2, HuPTEN3XhoI2, and PTEN-S10N-f, and inserted into <i>BglIII/XhoI</i> pKF3             | This study                  |
| pKF3-G20E           | hPTEN was mutated using primers HuPTEN5BamHI2, HuPTEN3XhoI2, PTEN-G20E-f and PTEN-G20E-r, and inserted into <i>BglIII/XhoI</i> pKF3 | This study                  |
| pJK1-L42R           |                                                                                                                                     | This study                  |
| pKF3-L42R           | L42R was amplified using primers HuPTEN5BamHI2 and HuPTEN3XhoI2, and inserted into <i>BglIII/XhoI</i> pKF3                          | This study                  |
| pKF3-F90S           | hPTEN was mutated using primers HuPTEN5BamHI2, HuPTEN3XhoI2, PTEN-F90S-f and PTEN-F90S-r, and inserted into <i>BglIII/XhoI</i> pKF3 | This study                  |
| pKF3-CBR3(K5A)      |                                                                                                                                     | Nguyen <i>et al.</i> (2013) |
| pKF3-S10N, A4       | S10N was amplified using primers HuPTEN5BamHI2 and HuPTEN3XhoI2, and inserted into <i>BglIII/NheI</i> pKF3-A4                       | This study                  |
| pKF3-G20E, A4       | G20E was amplified using primers HuPTEN5BamHI2 and HuPTEN3XhoI2, and inserted into <i>BglIII/NheI</i> pKF3-A4                       | This study                  |
| pKF3-L42R, A4       | L42R was amplified using primers HuPTEN5BamHI2 and HuPTEN3XhoI2, and inserted into <i>BglIII/NheI</i> pKF3-A4                       | This study                  |
| pKF3-F90S, A4       | F90S was amplified using primers HuPTEN5BamHI2 and HuPTEN3XhoI2, and inserted into <i>BglIII/NheI</i> pKF3-A4                       | This study                  |
| pKF3-CBR3(K5A), A4  |                                                                                                                                     | Nguyen <i>et al.</i> (2013) |
| pcDNA3.1-hPTEN      |                                                                                                                                     | Nguyen <i>et al.</i> (2013) |
| pcDNA3.1- A4        |                                                                                                                                     | Nguyen <i>et al.</i> (2013) |
| pcDNA3.1- C124S, A4 |                                                                                                                                     | Nguyen <i>et al.</i> (2013) |
| pcDNA3.1-S10N       | S10N-GFP was amplified using primers PTEN-TOPO-f and GFP-TOPO-r, and inserted into pcDNA3.1                                         | This study                  |
| pcDNA3.1-G20E       | G20E-GFP was amplified using primers PTEN-TOPO-f and GFP-TOPO-r, and inserted into pcDNA3.1                                         | This study                  |
| pcDNA3.1-L42R       | L42R-GFP was amplified using primers PTEN-TOPO-f and GFP-TOPO-r, and inserted into pcDNA3.1                                         | This study                  |
| pcDNA3.1-F90S       | F90S-GFP was amplified using primers PTEN-TOPO-f and GFP-TOPO-r, and inserted into pcDNA3.1                                         | This study                  |
| pcDNA3.1-CBR3(K5A)  | CBR3(K5A)-GFP was amplified using primers PTEN-TOPO-f and GFP-TOPO-r and inserted into pcDNA3.1                                     | This study                  |
| pcDNA3.1-S10N, A4   | S10N, A4-GFP was amplified using primers PTEN-TOPO-f and GFP-TOPO-r, and inserted into pcDNA3.1                                     | This study                  |
| pcDNA3.1-G20E, A4   | G20E, A4-GFP was amplified using primers PTEN-TOPO-f and GFP-TOPO-r, and inserted into pcDNA3.1                                     | This study                  |
| pcDNA3.1-L42R, A4   | L42R, A4-GFP was amplified using primers PTEN-TOPO-f and GFP-TOPO-r, and inserted into pcDNA3.1                                     | This study                  |

|                                             |                                                                                                                                               |                             |
|---------------------------------------------|-----------------------------------------------------------------------------------------------------------------------------------------------|-----------------------------|
| pcDNA3.1-F90S, A4                           | F90S, A4-GFP was amplified using primers PTEN-TOPO-f and GFP-TOPO-r, and inserted into pcDNA3.1                                               | This study                  |
| pcDNA3.1-CBR3(K5A), A4                      | CBR3(K5A), A4-GFP was amplified using primers PTEN-TOPO-f and GFP-TOPO-r, and inserted into pcDNA3.1                                          | This study                  |
| pcDNA3.1-hPTEN <sub>352-403</sub> -YFP-FLAG |                                                                                                                                               | Rahdar <i>et al.</i> (2009) |
| pHR-SIN-hPTEN                               | hPTEN-GFP was amplified using primers PTEN-BamHI-Kozak-f and GFP-NotI-r, and inserted into <i>BamHI/NotI</i> pHR-SIN-CSGW                     | This study                  |
| pHR-SIN-C124S                               | C124S-GFP was amplified using primers PTEN-BamHI-Kozak-f and GFP-NotI-r, and inserted into <i>BamHI/NotI</i> pHR-SIN-CSGW                     | This study                  |
| pHR-SIN-S10N                                | S10N-GFP was amplified using primers PTEN-BamHI-Kozak-f and GFP-NotI-r, and inserted into <i>BamHI/NotI</i> pHR-SIN-CSGW                      | This study                  |
| pHR-SIN-G20E                                | G20E-GFP was amplified using primers PTEN-BamHI-Kozak-f and GFP-NotI-r, and inserted into <i>BamHI/NotI</i> pHR-SIN-CSGW                      | This study                  |
| pHR-SIN-L42R                                | L42R-GFP was amplified using primers PTEN-BamHI-Kozak-f and GFP-NotI-r, and inserted into <i>BamHI/NotI</i> pHR-SIN-CSGW                      | This study                  |
| pHR-SIN-F90S                                | F90S-GFP was amplified using primers PTEN-BamHI-Kozak-f and GFP-NotI-r, and inserted into <i>BamHI/NotI</i> pHR-SIN-CSGW                      | This study                  |
| pHR-SIN-CBR3(K5A)                           | CBR3(K5A)-GFP was amplified using primers PTEN-BamHI-Kozak-f and GFP-NotI-r, and inserted into <i>BamHI/NotI</i> pHR-SIN-CSGW                 | This study                  |
| pKF3-Myr(PkbR1 <sub>1-54</sub> )            | 1-54 aa sequence of PkbR1 was amplified using primers pkbR-BamHI-Start and pkbR-XhoI-BgIII-162-145-2 and inserted into <i>BgIII/XhoI</i> pKF3 | This study                  |
| pKF3-Myr-A4                                 | A4 was amplified using primers PTEN-PkbR1-BamHI and HuPTEN3XhoI2, and inserted into <i>BgIII/XhoI</i> pKF3-Myr(PkbR1 <sub>1-54</sub> )        | This study                  |
| pcDNA3.1-Myr-A4                             | Myr-A4-GFP was amplified using primers PkbR1-TOPO-f and GFP-TOPO-r, and inserted into pcDNA3.1                                                | This study                  |
| pKF3-Myr-S10N, A4                           | S10N, A4 was amplified using primers PTEN-PkbR1-BamHI and HuPTEN3XhoI2, and inserted into <i>BgIII/XhoI</i> pKF3-Myr(PkbR1 <sub>1-54</sub> )  | This study                  |
| pcDNA3.1-Myr-S10N, A4                       | Myr-S10N, A4-GFP was amplified using primers PkbR1-TOPO-f and GFP-TOPO-r, and inserted into pcDNA3.1                                          | This study                  |
| pKF3-Myr-G20E, A4                           | G20E, A4 was amplified using primers PTEN-PkbR1-BamHI and HuPTEN3XhoI2, and inserted into <i>BgIII/XhoI</i> pKF3-Myr(PkbR1 <sub>1-54</sub> )  | This study                  |
| pcDNA3.1-Myr-G20E, A4                       | Myr-G20E, A4-GFP was amplified using primers PkbR1-TOPO-f and GFP-TOPO-r, and inserted into pcDNA3.1                                          | This study                  |
| pKF3-Myr-L42R, A4                           | L42R, A4 was amplified using primers PTEN-PkbR1-BamHI and HuPTEN3XhoI2 and inserted into <i>BgIII/XhoI</i> pKF3-Myr(PkbR1 <sub>1-54</sub> )   | This study                  |
| pcDNA3.1-Myr-L42R, A4                       | Myr-A4-GFP was amplified using primers PkbR1-TOPO-f and GFP-TOPO-r, and inserted into pcDNA3.1                                                | This study                  |
| pKF3-Myr-F90S, A4                           | F90S, A4 was amplified using primers PTEN-PkbR1-BamHI and HuPTEN3XhoI2, and inserted into <i>BgIII/XhoI</i> pKF3-Myr(PkbR1 <sub>1-54</sub> )  | This study                  |
| pcDNA3.1-Myr-F90S, A4                       | Myr-F90S, A4-GFP was amplified using primers PkbR1-TOPO-f and GFP-TOPO-r, and inserted into pcDNA3.1                                          | This study                  |
