# Supplementary material
Source: PubMed Central journal article supplement (PMC4377315)

A

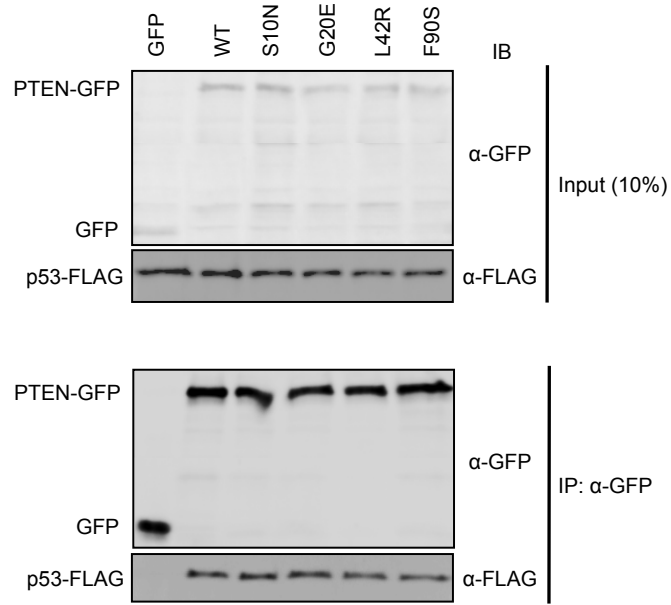

B

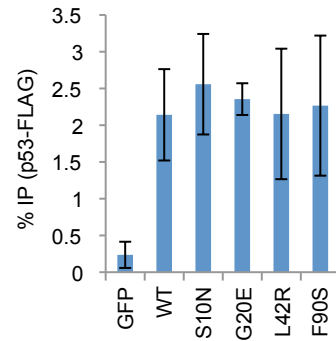

Supplement: NIHMS619140-supplement-5.pdf [file NIHMS619140-supplement-5.pdf]
